# Supplementary material
Source: publisher figshare collection journal article supplement (https://future-science-group.figshare.com/ndownloader/files/31608563)
Supplement: Supplementary file 1 [file 31608563]

# **Enhanced Metastatic Risk Assessment in Cutaneous Squamous Cell Carcinoma with the 40-Gene Expression Profile Test**

## **SUPPLEMENTAL FIGURES AND TABLES**

(Suppl Fig: 2, Suppl Tables: 3)

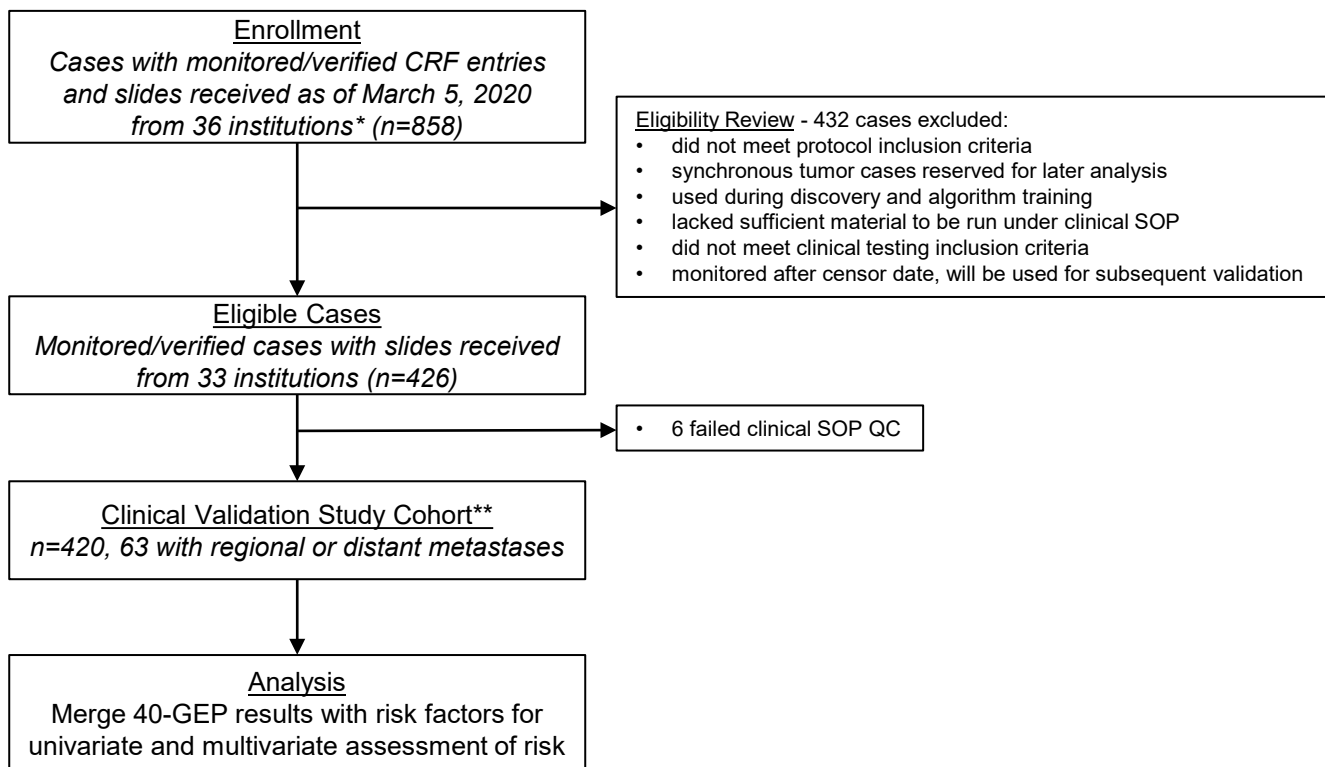

Supplemental Figure 1. Study design for the clinical validation cohort (n=420). \*Archival sample collection ongoing. \*\*Comprised of 307 previously-assessed (but not under clinical SOP, Wysong *et al.*, JAAD 2021)<sup>21</sup> and 113 novel samples. CRF: case report form; SOP: standard operating procedure; QC: quality control; 40-GEP: 40-gene expression profile; cSCC: cutaneous squamous cell carcinoma.

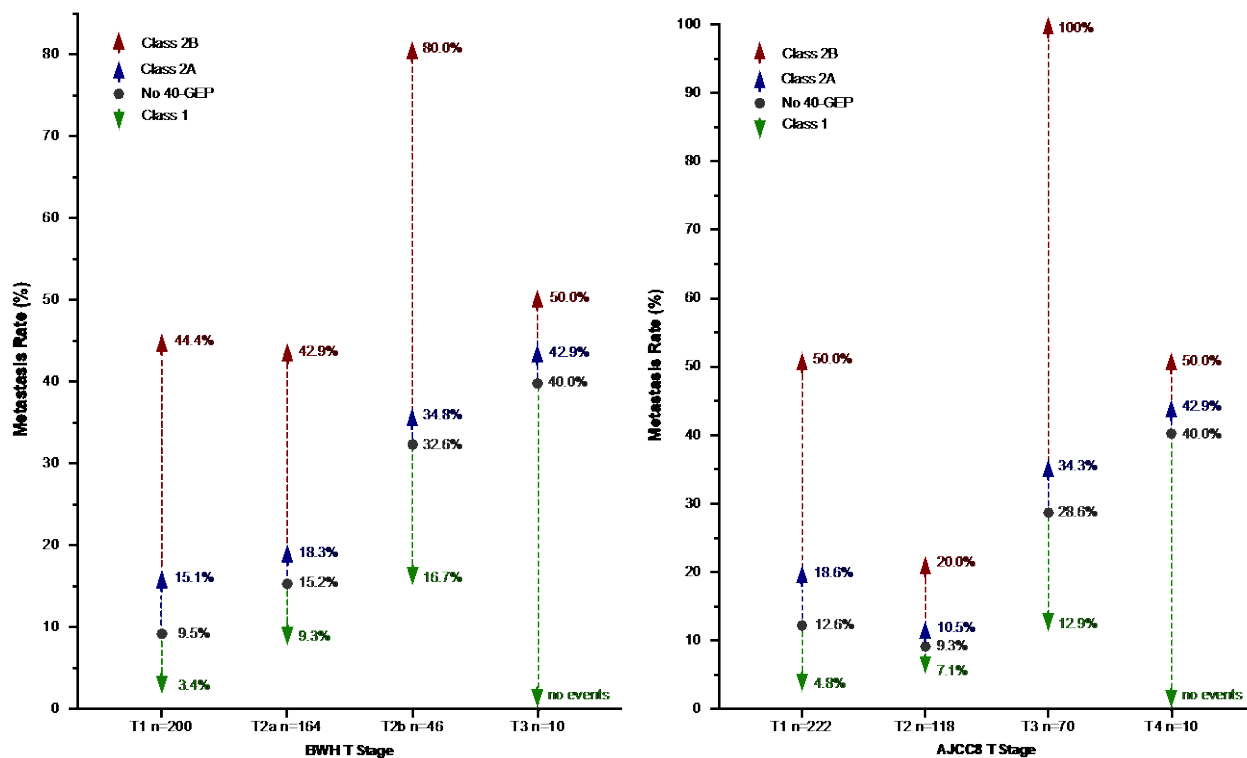

Supplemental Figure 2. Further stratification of metastatic risk by the 40-GEP test per BWH or AJCC8 T stage for the cSCC Validation Cohort (n=420). 40-GEP, 40-gene expression profile; BWH, Brigham and Women's Hospital; AJCC8, American Joint Committee on Cancer, Cancer Staging Manual, Eighth Edition; cSCC, cutaneous squamous cell carcinoma.
